# Supplementary material for: Machine Learning Predicting Optimal Preparation of Silica-Coated Gold Nanorods for Photothermal Tumor Ablation
Source: MDPI journal article supplement (doi:10.3390/nano13061024), 2023-03-12
Supplement: s1 [file s1]

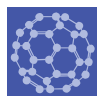

# Machine Learning Predicting Optimal Preparation of Silica-Coated Gold Nanorods for Photothermal Tumor Ablation

Jintao Zhang <sup>1</sup>, Jinchang Yin <sup>1,2,\*</sup>, Ruiran Lai <sup>1</sup>, Yue Wang <sup>1</sup>, Baorui Mao <sup>1</sup>, Haonan Wu <sup>1</sup>, Li Tian <sup>3</sup> and Yuanzhi Shao <sup>1,4,\*</sup>

<sup>1</sup> State Key Laboratory of Optoelectronic Materials and Technologies, School of Physics, Sun Yat-sen University, Guangzhou 510275, China

<sup>2</sup> Institute of Biological and Medical Engineering, Guangdong Academy of Sciences, Guangzhou 510316, China

<sup>3</sup> State Key Laboratory of Oncology in South China, Collaborative Innovation Center for Cancer Medicine, Sun Yat-sen University Cancer Center, Guangzhou 510060, China

<sup>4</sup> Guangdong Provincial Key Laboratory of Magnetoelectric Physics and Devices, Sun Yat-sen University, Guangzhou 510275, China

\* Correspondence: yinch6@mail.sysu.edu.cn (J.Y.); stssyz@mail.sysu.edu.cn (Y.S.)

**Table S1.** Optimal hyperparameters obtained through 5-fold GridSearchCV procedures.

| Models  | Full Name                       | Hyperparameters                                                                                                        |
|---------|---------------------------------|------------------------------------------------------------------------------------------------------------------------|
| KNN     | k-Nearest Neighbors             | n_neighbors = 10                                                                                                       |
| LR      | Logistic Regression             | C = 10, max_iter = 100                                                                                                 |
| SVM     | Support Vector Machines         | C = 10, gamma = 1, kernel = 'rbf'                                                                                      |
| DT      | Decision Tree                   | max_depth = 9                                                                                                          |
| RF      | Random Forest                   | n_estimators = 400, max_depth = 8                                                                                      |
| ADA     | AdaBoost                        | DecisionTreeClassifier(max_depth = 6), learning_rate = 0.1, n_estimators = 450                                         |
| GBDT    | Gradient Boosting Decision Tree | learning_rate = 0.1, max_depth = 3, n_estimators = 150                                                                 |
| XGBoost | eXtreme Gradient Boosting       | max_depth = 5, n_estimators = 419, min_child_weight = 1, subsample = 0.9, colsample_bytree = 0.9, learning_rate = 0.01 |

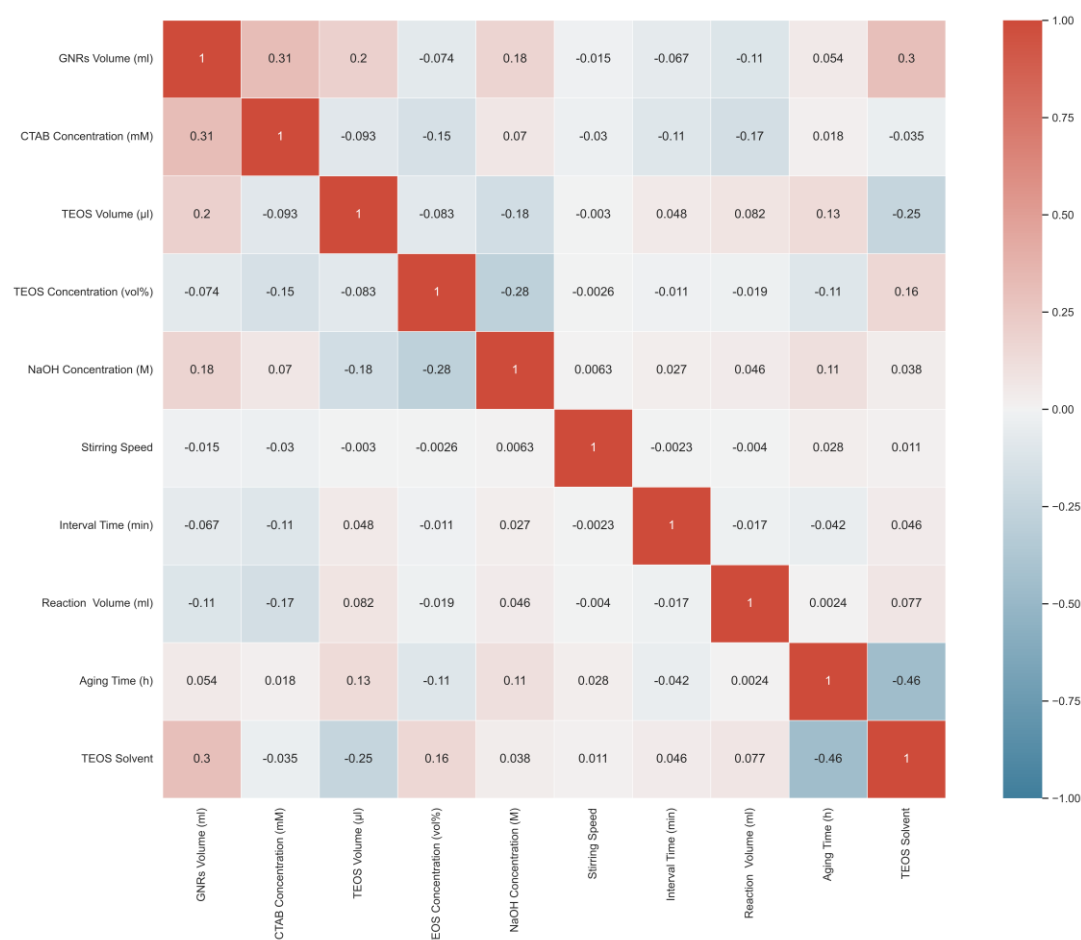

**Figure S1.** The heat map with values of the Pearson's correlation coefficient matrix among the features selected for the preparation of silica-coated GNRs.

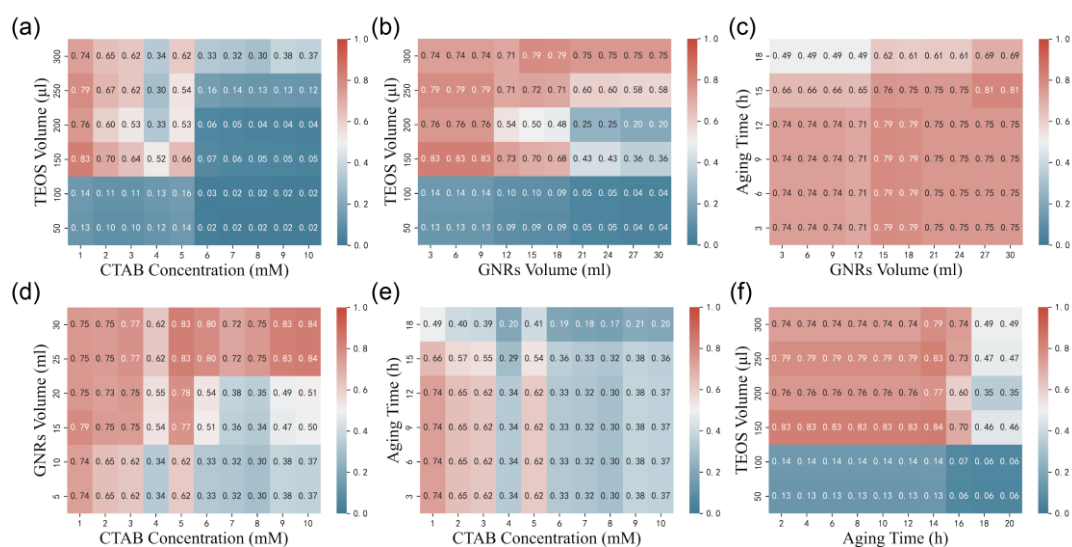

**Figure S2.** The heatmap of predictions from the trained model represented by the matrix formed by the four most important features: (a) TEOS volume in a single injection versus CTAB concentration, (b) GNRs volume versus TEOS volume in a single injection, (c) Aging time versus GNRs volume, (d) GNRs volume versus CTAB concentration, (e) Aging time versus CTAB concentration, (f) Aging time versus TEOS volume in a single injection.

**Table S2.** Parameter space for each experimental variable.

| Process parameters                                                         | Prediction space                                                                    |
|----------------------------------------------------------------------------|-------------------------------------------------------------------------------------|
| The amount of gold nanorods                                                | [1,2,3, 4,5,6,7,8,9,10,11,12,13,14,15,16,17,18,19,20,21,22,23,24,25,26,27,28,29,30] |
| The concentration of cetyltrimethylammonium bromide (CTAB) in the solution | [0,1,2, 3, 4,5,6,7,8,9,10,11,12,13,14,15,16,17,18,19]                               |
| The volume of tetraethyl orthosilicate (TEOS) in a single injection        | [50,100,150, 200,250,300,350,400,450,500]                                           |
| The concentration of TEOS solution                                         | [0.25,0.5,0.75]                                                                     |
| The concentration of Sodium hydroxide (NaOH) solution                      | [0.025,0.05,0.1]                                                                    |
| The rate of stirring mixtures in the solution                              | [0,1,2]                                                                             |
| The Interval between drops of TEOS solution                                | [20,30,40,50]                                                                       |
| The total volume of the solution                                           | [15,20,30,40]                                                                       |
| The age of the solution                                                    | [6,9,12,14,15,16,18]                                                                |
| The solvent of TEOS solution                                               | [0.2818, 0.08888889] <sup>a</sup>                                                   |

<sup>a</sup>0.2818 and 0.08888889 in the solvent represent the values after target coding for the two solvents ethanol and isopropanol for TEOS, respectively.

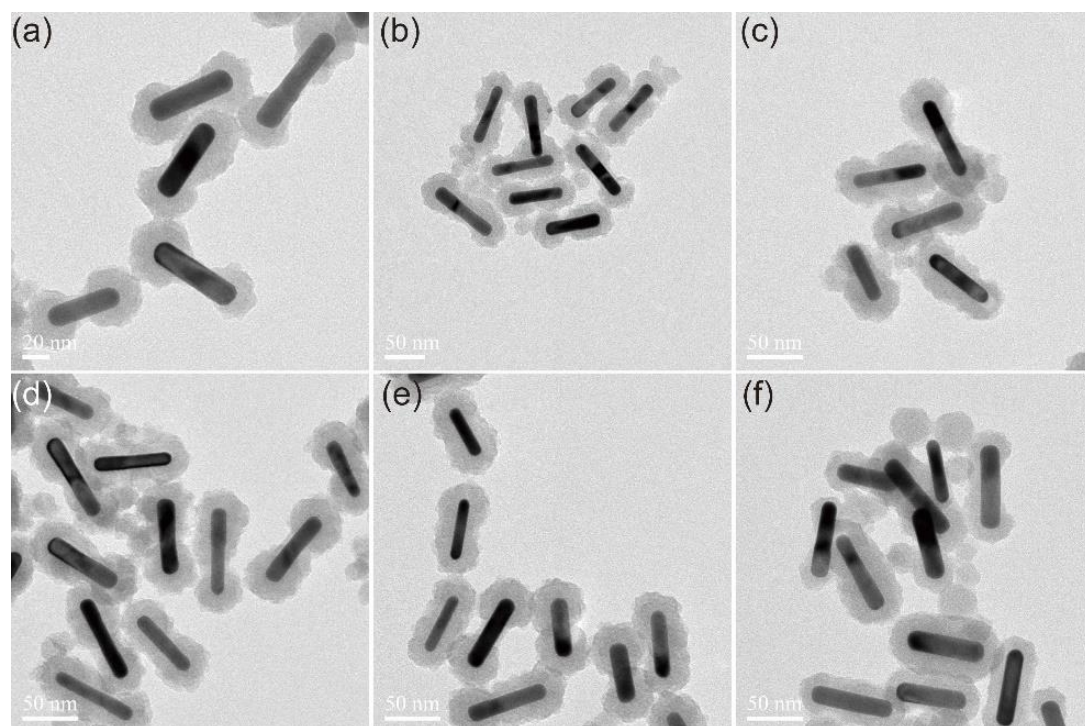

**Figure S3.** TEM images of the validation experiments. (a), (b), (c), (d), (e) and (f) are the TEM images of the experimental groups corresponding to the IDs in Table S3, respectively.

**Table S3.** Parameters of the validation experiments obtained with high throughput prediction and combined effects.

| ID | $V_{\text{GNRs}}$ | $C_{\text{CTAB}}$ | $V_{\text{TEOS}}$ | $C_{\text{NaOH}}$ | $N_{\text{Stirring}}$ | $t_{\text{Interval}}$ | $t_{\text{Aging}}$ | Probability |
|----|-------------------|-------------------|-------------------|-------------------|-----------------------|-----------------------|--------------------|-------------|
| A  | 29                | 5                 | 300               | 0.1               | 1                     | 50                    | 16                 | 0.92        |
| B  | 29                | 5                 | 400               | 0.1               | 2                     | 50                    | 16                 | 0.92        |
| C  | 28                | 5                 | 450               | 0.1               | 2                     | 50                    | 16                 | 0.92        |
| D  | 28                | 5                 | 500               | 0.1               | 1                     | 50                    | 16                 | 0.92        |
| E  | 27                | 5                 | 450               | 0.1               | 1                     | 50                    | 16                 | 0.92        |
| F  | 26                | 5                 | 450               | 0.1               | 0                     | 50                    | 16                 | 0.92        |
| G  | 10                | 1                 | 150               | 0.1               | 1                     | 30                    | 12                 | 0.83        |
| H  | 10                | 1                 | 200               | 0.1               | 1                     | 30                    | 12                 | 0.76        |
| I  | 10                | 1                 | 250               | 0.1               | 1                     | 30                    | 12                 | 0.79        |
| J  | 10                | 1                 | 300               | 0.1               | 1                     | 30                    | 12                 | 0.74        |

Other parameters not listed in the table are identical, e.g. TEOS concentration is 25 vol%, reaction volume is 15 mL, and the solvent for TEOS is alcohol.

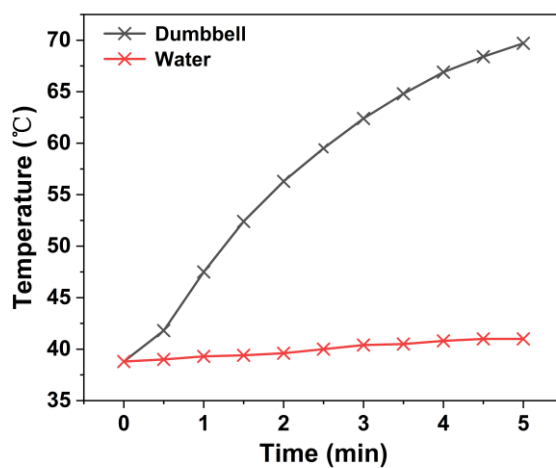

**Figure S4.** The temperature-rising curve of photothermal images of dumbbell silica-coated GNRs.

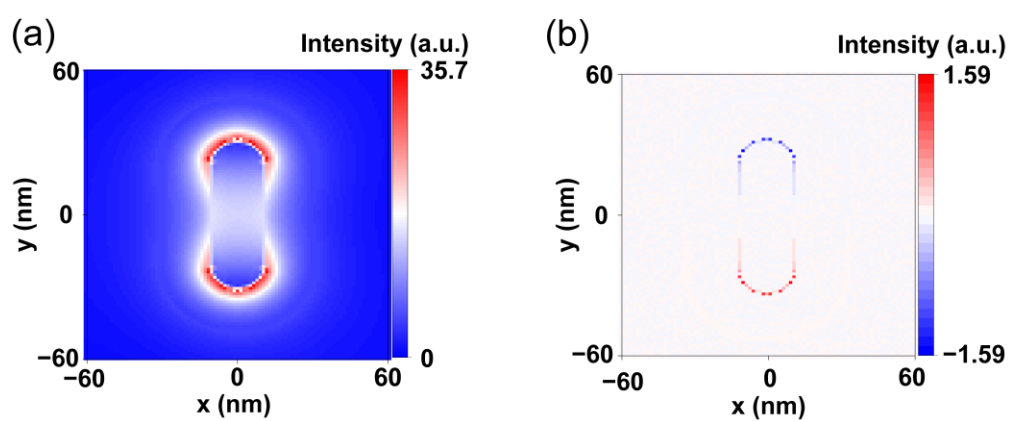

**Figure S5.** Electric field enhancement and charge distribution in cylindrical silica-coated GNRs.

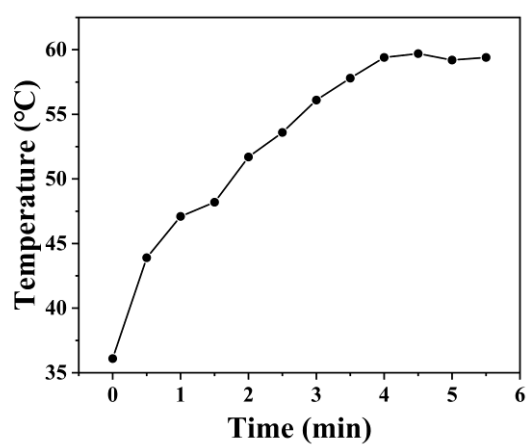

**Figure S6.** *In vivo* photothermal temperature rising curve in tumor site of mice.
